# Supplementary material for: Brachygnathia Inferior in Cloned Dogs Is Possibly Correlated with Variants of Wnt Signaling Pathway Initiators
Source: MDPI journal article supplement (doi:10.3390/ijms23010475), 2022-01-01
Supplement: s1 [file s1]

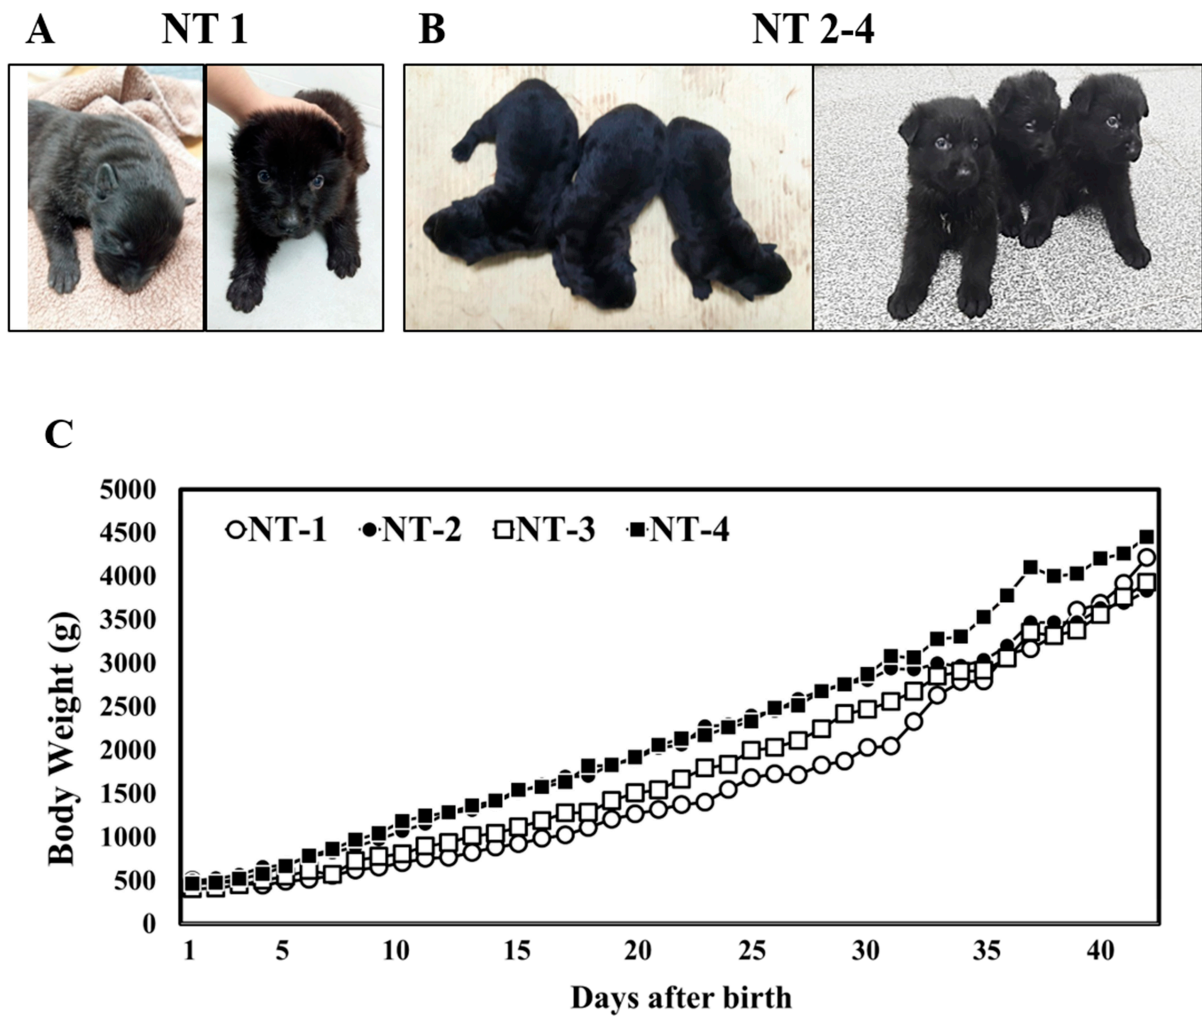

Supplementary Figure S1. Production of cloned newborn puppies and daily body weight monitoring of cloned puppies.

(A) NT-1 obtained by caesarian section of SMD1, (B) puppies (NT-2, 3 and 4 from SMD2) at the age of 1 day and ~4 weeks, (C) body weights of NT-1~4 from one day to 42 days after birth.
