# Supplementary material for: Brachygnathia Inferior in Cloned Dogs Is Possibly Correlated with Variants of Wnt Signaling Pathway Initiators
Source: MDPI journal article supplement (doi:10.3390/ijms23010475), 2022-01-01
Supplement: s1 [file s1]

Supplementary Table S1. Results of sequencing quality.

| Name | Pairs       | Reads       | Length(bp)     | Avg.Qual | GC   | DUP |
|------|-------------|-------------|----------------|----------|------|-----|
| OD   | 445,068,246 | 890,136,492 | 89,903,785,692 | 35       | 40.0 | 95  |
| NT 1 | 376,391,542 | 752,783,084 | 76,031,091,484 | 35       | 40.0 | 86  |
| NT 2 | 444,198,561 | 888,397,122 | 89,728,109,322 | 35       | 40.0 | 95  |
| NT 3 | 470,391,857 | 940,783,714 | 95,019,155,114 | 34       | 40.0 | 83  |
| NT 4 | 434,429,759 | 868,859,518 | 87,754,811,318 | 35       | 39.9 | 84  |

Pairs, Count of read pair; Reads, Total read count; Length, Total length; Avg.Qual., average of sequence quality ; GC, GC Content; DUP, Total Duplication Percentage.

Supplementary Table S2. Results of mapping sequence

| Sample | Raw            | Trimmed<br>(%)          | Mapped<br>(%)           | Dedup<br>(%)            | Depth |
|--------|----------------|-------------------------|-------------------------|-------------------------|-------|
| OD     | 89,903,785,692 | 89,650,467,408<br>99.7% | 88,527,192,302<br>98.5% | 84,375,551,803<br>93.9% | 35.0x |
| NT 1   | 76,031,091,484 | 75,816,074,876<br>99.7% | 74,783,520,294<br>98.4% | 72,045,769,760<br>94.8% | 29.9x |
| NT 2   | 89,728,109,322 | 89,461,444,841<br>99.7% | 88,228,245,826<br>98.3% | 84,221,546,412<br>93.9% | 34.9x |
| NT 3   | 95,019,155,114 | 94,736,075,577<br>99.7% | 93,409,043,586<br>98.3% | 88,251,673,559<br>92.9% | 36.6x |
| NT4    | 87,754,811,318 | 87,502,934,928<br>99.7% | 86,179,435,833<br>98.2% | 82,122,254,171<br>93.6% | 34.1x |

Raw, Total length of reads; Trimmed, Total length of trimmed reads; Mapped, Total length of mapped reads; Dedup, Total length of de-duplicated reads

Supplementary Table S3. Results of variations in genomic region

| Sample | UP      | 5-<br>UTR | Exon   | Intron    | Splice<br>site | Tran | 3-<br>UTR | Down    | Inter     |
|--------|---------|-----------|--------|-----------|----------------|------|-----------|---------|-----------|
|        |         |           |        |           | Acc            |      | Reg       |         |           |
| OD     | 519,176 | 11,339    | 74,791 | 2,815,251 | 7,078          | 19   | 32,954    | 483,479 | 3,828,492 |
|        |         |           |        |           | 600            | 365  | 6,113     |         |           |
| NT 1   | 510,178 | 10,582    | 72,823 | 2,783,065 | 6,967          | 20   | 32,544    | 476,376 | 3,774,444 |
|        |         |           |        |           | 593            | 346  | 6,028     |         |           |
| NT 2   | 518,512 | 11,074    | 74,208 | 2,813,433 | 7,085          | 22   | 32,942    | 483,186 | 3,827,407 |
|        |         |           |        |           | 610            | 361  | 6,114     |         |           |
| NT 3   | 522,747 | 11,229    | 74,316 | 2,826,747 | 7,099          | 20   | 33,127    | 486,699 | 3,831,383 |
|        |         |           |        |           | 613            | 347  | 6,139     |         |           |
| NT4    | 515,495 | 10,684    | 73,666 | 2,807,648 | 7,059          | 21   | 32,881    | 481,453 | 3,816,402 |
|        |         |           |        |           | 598            | 350  | 6,111     |         |           |

UP, Upstream; Acc, Splice Site Acceptor; Don, Splice Site Donor; Reg, Splice Site Region; Tran, Transcript; Down, downstream; Inter, Intergenic
